# Supplementary material for: 16S and 23S rRNA Gene Mutation Independent Multidrug Resistance of Non-Tuberculous Mycobacteria Isolated from South Korean Soil
Source: PubMed Central journal article supplement (PMC7465728; doi:10.3390/microorganisms8081114), 2020-07-24
Supplement: microorganisms-08-01114-s001.pdf [file microorganisms-08-01114-s001.pdf]

Table S1. Antibiotic resistance patterns of nontuberculous mycobacterial isolate in South Korean soils

| NTM species                     |                                 | Resistant pattern               | No. of isolates |
|---------------------------------|---------------------------------|---------------------------------|-----------------|
| MAC                             | <i>M.intracellulare</i>         | RIF+STR+AMK+AZI+ETH+INZ+IMP     | 1               |
|                                 |                                 | STR+AMK+AZI+ETH+INZ+MXF+IMP     | 1               |
|                                 |                                 | RIF+STR+AMK+AZI+INZ+IMP         | 1               |
|                                 |                                 | STR+AMK+AZI+ETH+INZ+IMP         | 5               |
|                                 |                                 | STR+AMK+ETH+INZ+IMP             | 2               |
|                                 |                                 | STR+AMK+AZI+INZ+IMP             | 11              |
|                                 |                                 | STR+ETH+INZ+IMP                 | 1               |
|                                 |                                 | STR+AZI+INZ+IMP                 | 1               |
|                                 |                                 | AMK+AZI+INZ+IMP                 | 1               |
|                                 |                                 | AMK+ETH+INZ+IMP                 | 2               |
|                                 |                                 | STR+INZ+IMP                     | 2               |
|                                 |                                 | ETH+INZ+IMP                     | 1               |
|                                 |                                 | INZ+IMP                         | 1               |
|                                 |                                 | AMK+IMP                         | 1               |
|                                 |                                 | STR+IMP                         | 1               |
|                                 |                                 | INZ                             | 1               |
|                                 |                                 | IMP                             | 1               |
|                                 |                                 | Susceptible to all tested drugs | 1               |
|                                 |                                 | <i>M.colombiense</i>            | STR+INZ+IMP     |
|                                 | INZ+IMP                         |                                 | 2               |
|                                 | STR+IMP                         |                                 | 3               |
|                                 | INZ                             |                                 | 3               |
|                                 | IMP                             |                                 | 1               |
|                                 | Susceptible to all tested drugs |                                 | 8               |
|                                 | <i>M.chimaera</i>               | ETH+INZ+IMP                     | 1               |
|                                 |                                 | INZ+IMP                         | 2               |
|                                 |                                 | AZI+IMP                         | 1               |
|                                 |                                 | INZ                             | 1               |
|                                 |                                 | Susceptible to all tested drugs | 1               |
|                                 | <i>M.marseillense</i>           | INZ+IMP                         | 5               |
|                                 |                                 | Susceptible to all tested drugs | 1               |
|                                 | <i>M.bouchedurhonense</i>       | STR+IMP                         | 1               |
|                                 |                                 | INZ                             | 1               |
| Susceptible to all tested drugs |                                 | 1                               |                 |
| <i>M.vulneris</i>               | INZ+IMP                         | 1                               |                 |
|                                 | Susceptible to all tested drugs | 1                               |                 |
| <i>M.kumamotoense</i>           | STR+AMK+INZ+IMP                 | 2                               |                 |
|                                 | STR+AZI+ETH+INZ+IMP             | 1                               |                 |
|                                 | STR+AZI+INZ+IMP                 | 1                               |                 |

|                    |                           |                         |                                 |   |
|--------------------|---------------------------|-------------------------|---------------------------------|---|
| Non-MAC SGM        |                           | STR+INZ+IMP             | 1                               |   |
|                    |                           | STR+ETH+INZ+IMP         | 1                               |   |
|                    |                           | ETH+INZ+IMP             | 1                               |   |
|                    | <i>M.saskatchewanense</i> |                         | STR+INZ                         | 1 |
|                    |                           |                         | INZ                             | 6 |
|                    |                           |                         | Susceptible to all tested drugs | 1 |
|                    | <i>M.paraense</i>         |                         | RIF+STR+AZI+ETH+IMP             | 1 |
|                    |                           |                         | STR+INZ                         | 1 |
|                    |                           |                         | ETH+INZ                         | 1 |
|                    |                           |                         | INZ                             | 1 |
|                    | <i>M.engbaekii</i>        |                         | STR+AMK+ETH+INZ+MXF+IMP         | 1 |
|                    |                           |                         | STR+AMK+INZ+MXF+IMP             | 1 |
|                    |                           |                         | STR+AMK+AZI+INZ+MXF+IMP         | 1 |
|                    | <i>M.parmense</i>         |                         | INZ+IMP                         | 1 |
|                    |                           |                         | INZ                             | 1 |
|                    | <i>M.sinense</i>          |                         | INZ+IMP                         | 2 |
|                    |                           |                         | STR+INZ+IMP                     | 1 |
|                    |                           |                         | INZ                             | 1 |
|                    | <i>M.genavense</i>        |                         | INZ                             | 1 |
|                    | <i>M.parascrofulaceum</i> |                         | INZ+IMP                         | 1 |
| <i>M.europaeum</i> |                           | IMP                     | 1                               |   |
| <i>M.shimodei</i>  |                           | INZ+IMP                 | 1                               |   |
| <i>M.mantanii</i>  |                           | STR+INZ+IMP             | 1                               |   |
| RGM                | <i>M.fortuitum</i>        | RIF+STR+AZI+INZ         | 1                               |   |
|                    |                           | RIF+AZI+INZ             | 1                               |   |
|                    |                           | RIF+STR+AZI+ETH+INZ     | 1                               |   |
|                    |                           | RIF+STR+AZI+INZ         | 2                               |   |
|                    |                           | RIF+AZI+INZ             | 1                               |   |
|                    | <i>M.peregrinum</i>       | RFI+STR+ETH+INZ         | 2                               |   |
|                    |                           | STR+AZI+ETH+INZ         | 1                               |   |
|                    |                           | RIF+ETH+INZ             | 1                               |   |
|                    |                           | RIF+STR+INZ             | 2                               |   |
|                    |                           | RIF+INZ+IMP             | 1                               |   |
|                    |                           | ETH+INZ                 | 4                               |   |
|                    |                           | STR+INZ                 | 1                               |   |
|                    |                           | INZ+IMP                 | 1                               |   |
|                    |                           | INZ                     | 2                               |   |
|                    | STR                       | 1                       |                                 |   |
|                    | <i>M.septicum</i>         | RIF+STR+ETH+INZ+MXF+IMP | 1                               |   |
|                    |                           | AZI+INZ+IMP             | 1                               |   |
|                    |                           | ETH+INZ                 | 1                               |   |
|                    | <i>M.houstonense</i>      |                         | STR+ETH+INZ+MXF+IMP             | 1 |

|  |                   |                         |   |
|--|-------------------|-------------------------|---|
|  | <i>M.chelonae</i> | RIF+STR+AZI+ETH+INZ+IMP | 1 |
|--|-------------------|-------------------------|---|

Table S2. Minimal inhibitory concentrations of the slowly growing mycobacteria isolates

| Range of MIC ( g/ml ) | 0.0625 | 0.125 | 0.25 | 0.5 | 1  | 2  | 4  | 8  | 16 | 32 | 64 | 128 | 256 | 512 | >512 |
|-----------------------|--------|-------|------|-----|----|----|----|----|----|----|----|-----|-----|-----|------|
| RIF                   | 37     | 7     | 24   | 10  | 13 | 8  | 4  | 1  | -  | 1  | 1  | -   |     |     |      |
| STR                   |        |       | 24   | 5   | 13 | 7  | 9  | 14 | 11 | 2  | 12 | 5   | 2   | 1   | 1    |
| AMK                   |        |       | 11   | 4   | 18 | 19 | 3  | 6  | 5  | 10 | 17 | 10  | -   | 3   | -    |
| AZI                   |        |       | 8    | 9   | 16 | 15 | 16 | 6  | 9  | 16 | 7  | 1   | 1   | 2   | -    |
| ETH                   |        |       | 9    | 8   | 21 | 33 | 15 | 6  | 5  | 5  | 1  | -   | -   | 1   | 2    |
| INZ                   |        |       | 13   | 9   | 9  | 15 | 14 | 10 | 12 | 11 | 1  | 3   | 7   | 1   | 1    |
| MXF                   | 29     | 10    | 29   | 9   | 15 | 10 | -  | -  | 1  | -  | 1  | 2   |     |     |      |
| IMP                   |        |       | 8    | 3   | 2  | 5  | 2  | 4  | 9  | 8  | 13 | 11  | 38  | 3   |      |

Table S3. Minimal inhibitory concentrations of the rapidly growing mycobacteria isolates

| Range of MIC ( g/ml ) | 0.0625 | 0.125 | 0.25 | 0.5 | 1 | 2  | 4 | 8 | 16 | 32 | 64 | 128 | 256 | 512 | >512 |
|-----------------------|--------|-------|------|-----|---|----|---|---|----|----|----|-----|-----|-----|------|
| RIF                   | 2      | 1     | 3    | 7   | 3 | 4  | 2 | 1 | 3  | 1  |    |     |     |     |      |
| STR                   |        |       | -    | 1   | - | 6  | 6 | 7 | 4  | 2  | 1  | -   | -   | -   |      |
| AMK                   |        |       | 3    | -   | 3 | 12 | 2 | 3 | 3  | 1  | -  | -   | -   | -   |      |
| AZI                   |        |       | 4    | 7   | 4 | 1  | 1 | 2 | 1  | -  | 1  | 1   | 5   | -   |      |
| ETH                   |        |       | 1    | -   | 1 | 7  | 6 | 3 | 5  | -  | -  | -   | -   | 1   | 3    |
| INZ                   |        |       | -    | -   | 3 | 1  | 6 | 2 | 1  | 1  | 6  | 2   | 3   | -   | 2    |
| MXF                   | 13     | -     | 12   | 1   | - | -  | - | - | -  | 1  | -  | -   |     |     |      |
| IMP                   |        |       | -    | 1   | 4 | 3  | 5 | 3 | 6  | 1  | -  | -   | 4   |     |      |
